# Supplementary material
Source: PubMed Central journal article supplement (PMC6927032)
Supplement: NIHMS1063217-supplement-SI.pdf [file NIHMS1063217-supplement-SI.pdf]

## Non-ribosomal Peptide Extension by a Peptide Amino-acyl tRNA Ligase

Zhengan Zhang,<sup>1</sup> and Wilfred A. van der Donk<sup>1,2\*</sup>

### Affiliations:

<sup>1</sup>Department of Chemistry, University of Illinois at Urbana–Champaign, Urbana, IL, USA.

<sup>2</sup>Howard Hughes Medical Institute, University of Illinois at Urbana–Champaign, Urbana, IL, USA.

\* Corresponding author:

Wilfred A. van der Donk (vddonk@illinois.edu), phone: 1-217-244-5360, fax: 1-217-244-8533

### Table of Contents:

|                                                                                                                                                                            |     |
|----------------------------------------------------------------------------------------------------------------------------------------------------------------------------|-----|
| Figure S1: Competitive binding of TglA variants to TglB .....                                                                                                              | S2  |
| Figure S2: TglB is relatively promiscuous towards a change of the last amino acid of TglA.....                                                                             | S4  |
| Figure S3: <i>P. syringae</i> tRNA <sup>Cys</sup> mini- or micro-helix is sufficient to catalyze the in vitro cysteinyl-<br>ation reaction.....                            | S5  |
| Figure S4: TglB hydrolyzes ATP in the absence of substrate TglA.....                                                                                                       | S6  |
| Figure S5: Potential ping-pong mechanism involving the formation of an aminoacyl-enzyme intermediate<br>.....                                                              | S7  |
| Figure S6: Sequence alignment of TglB homologs .....                                                                                                                       | S11 |
| Figure S7: Mutagenesis of selective Ser, Thr and Tyr residues of TglB does not support the ping-pong<br>mechanism in Figure S4 or Figure S7.....                           | S12 |
| Figure S8: Potential mechanism in which TglA is covalently linked to a hydroxyl group of TglB.....                                                                         | S13 |
| Figure S9: A potential mechanism in which the C-terminus TglA is first activated by ATP, followed by<br>attack by a carboxylate residue on TglB to form an anhydride ..... | S14 |
| Figure S10: A potential ping-pong mechanism with a covalent acyl-phosphate intermediate .....                                                                              | S15 |
| Figure S11: SDS-PAGE analysis of TglB variants with diminished activity .....                                                                                              | S16 |
| Figure S12: MALDI-TOF-MS spectra of in vitro cysteinyl-ation of TglA with TglB variants .....                                                                              | S17 |
| Figure S13: MALDI-TOF-MS spectra of NH <sub>2</sub> OH quenching assays with TglB dead mutants .....                                                                       | S18 |
| Table S1: Activity of alanine-substituted TglB proteins.....                                                                                                               | S19 |
| Table S2: Oligonucleotide primers used in this study .....                                                                                                                 | S20 |

**Figure S1. Competitive binding of TgIA variants to TgIB.** Competitive fluorescence polarization traces for binding of wild-type (WT) TgIA and TgIA variants to TgIB. These peptides were used to titrate TgIB (3  $\mu\text{M}$ ) complexed with fluorescein-labeled peptide consisting of the 20 C-terminal amino acids of TgIA (25 nM). Error bars represent standard deviation (s.d.) of three independent replicates. Errors on  $\text{IC}_{50}$  are the standard error of the mean (s.e.m.) given by regression analysis.

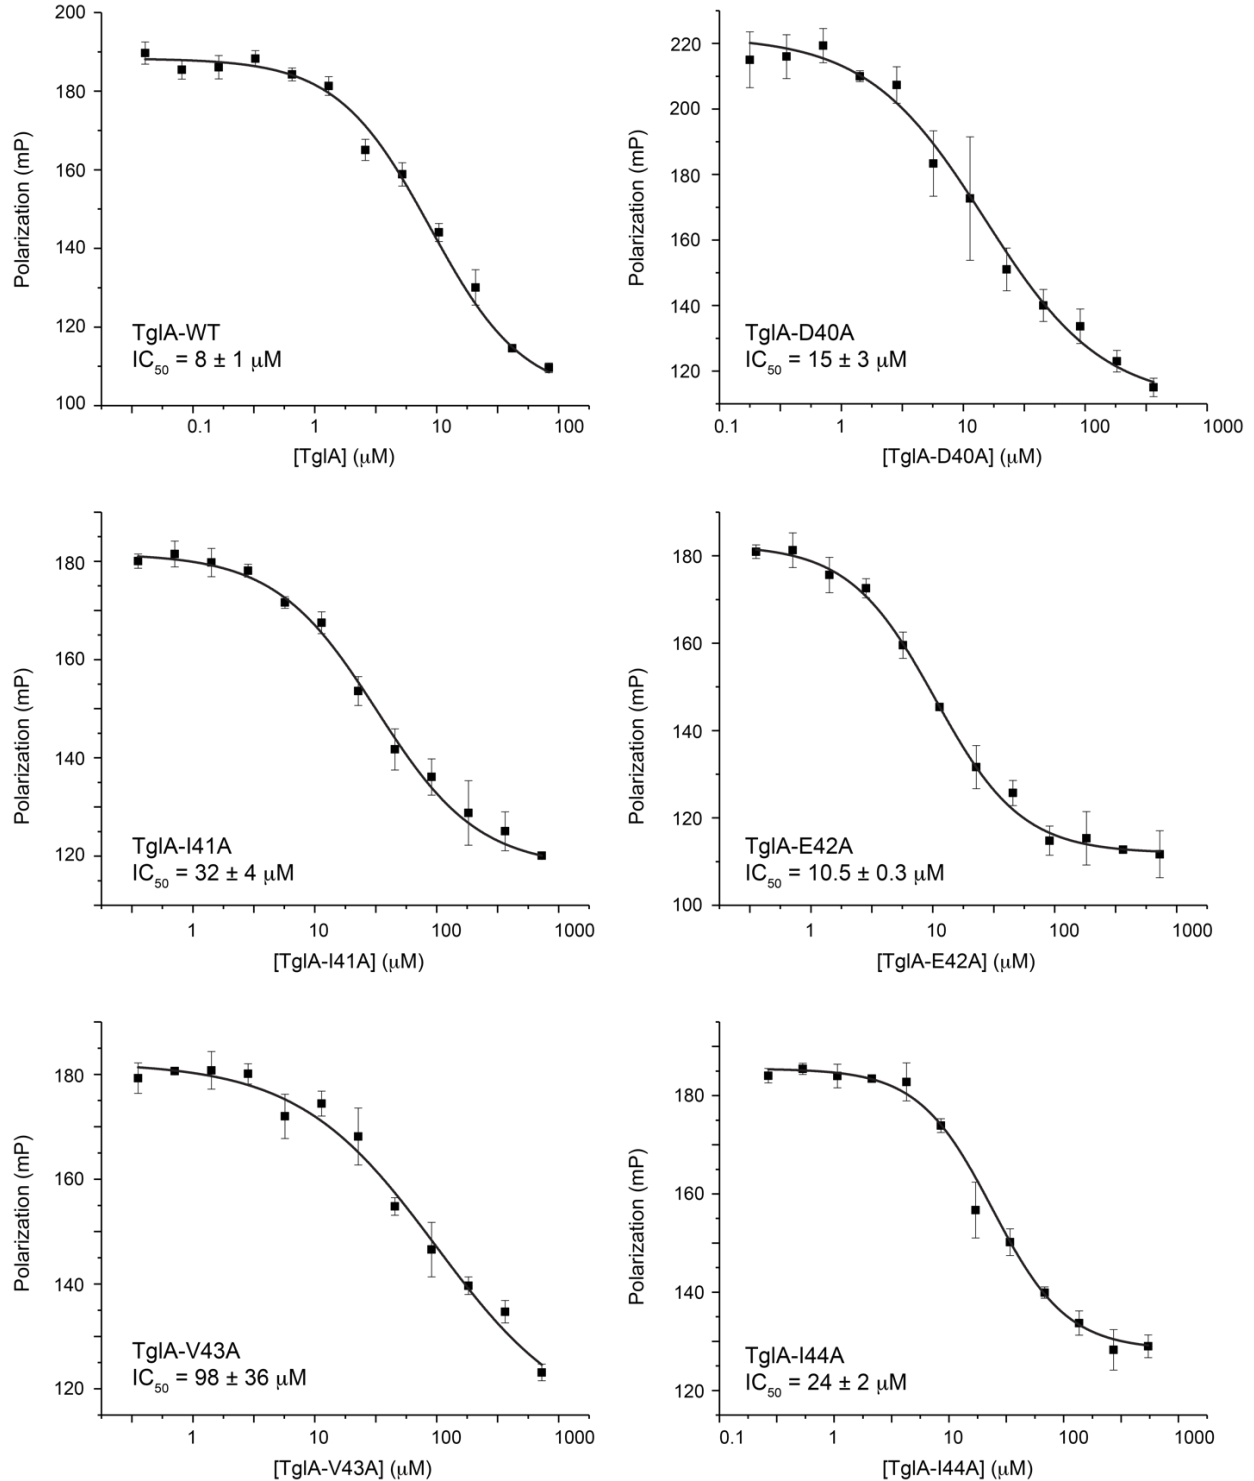

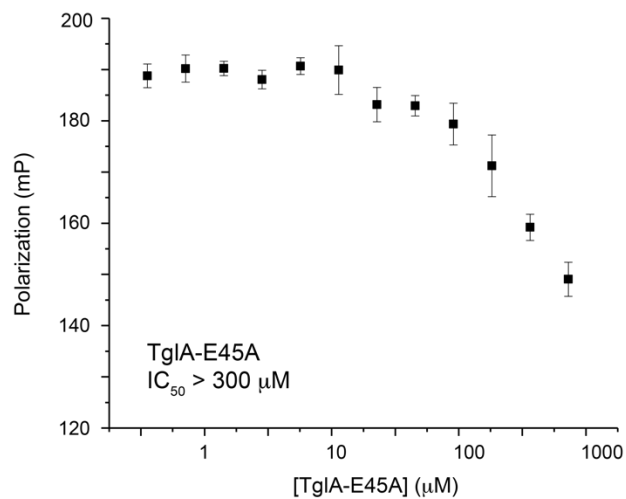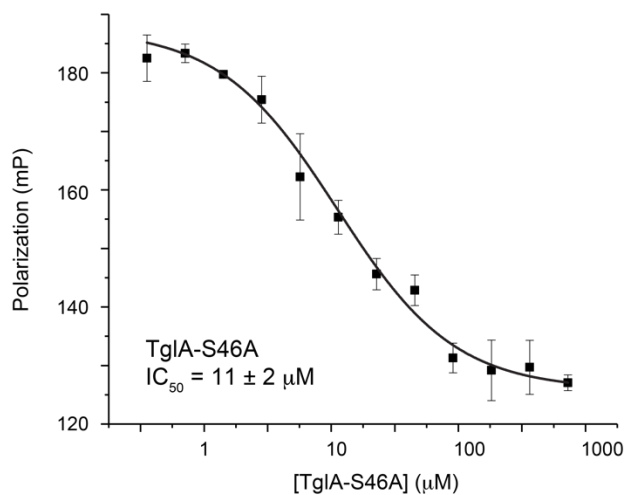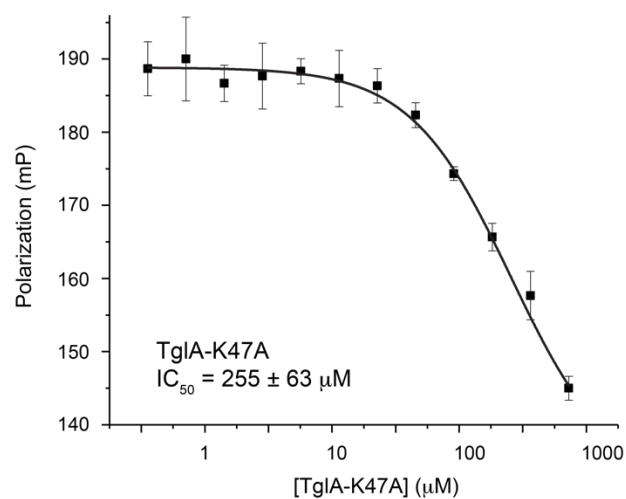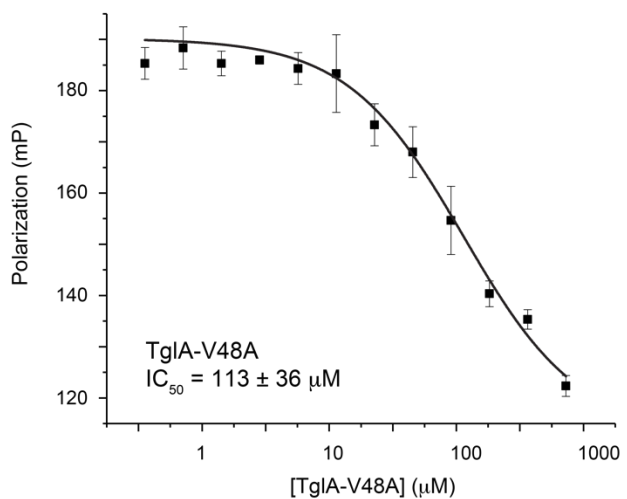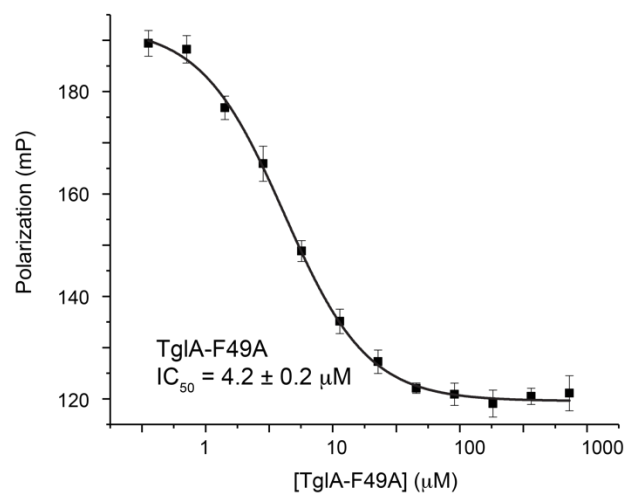

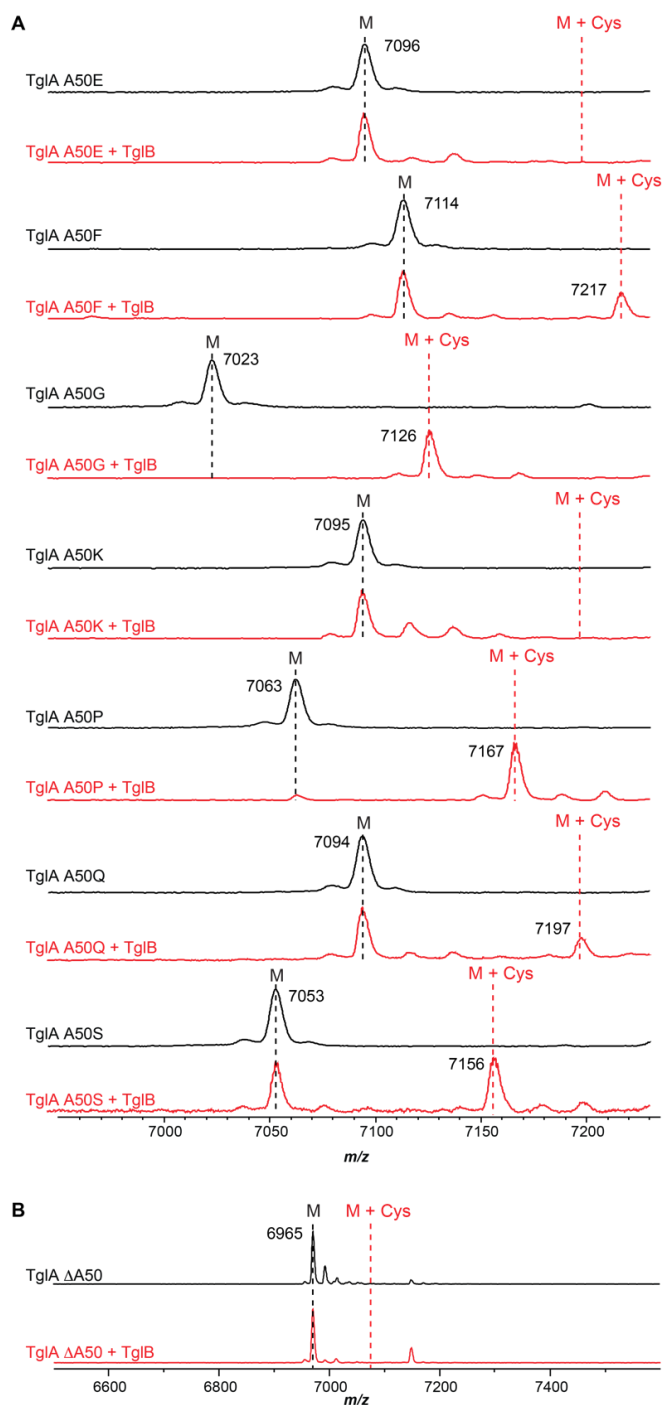

**Figure S2. TglB is relatively promiscuous towards a change of the last amino acid of TglA.** MALDI-TOF mass spectra of (A) TglA-Ala50 variants and their co-expression products with TglB in *E. coli*. (TglA A50E, calc.  $[M+H]^+$ , 7095. TglA\_A50F, calc.  $[M+H]^+$ , 7114; TglA\_A50F\_Cys, calc.  $[M+H]^+$ , 7217. TglA\_A50G, calc.  $[M+H]^+$ , 7023; TglA\_A50G\_Cys, calc.  $[M+H]^+$ , 7127. TglA\_A50K, calc.  $[M+H]^+$ , 7095. TglA\_A50P, calc.  $[M+H]^+$  7063; TglA\_A50P\_Cys, calc.  $[M+H]^+$ , 7167. TglA\_A50Q, calc.  $[M+H]^+$ , 7094; TglA\_A50Q\_Cys, calc.  $[M+H]^+$ , 7198. TglA\_A50S, calc.  $[M+H]^+$ , 7053; TglA\_A50S\_Cys, calc.  $[M+H]^+$ , 7157). (B) TglA  $\Delta$ A50 variant and its product after co-expression with TglB in *E. coli*. (TglA  $\Delta$ A50, calc.  $[M+H]^+$ , 6966). All m/z values are average masses.

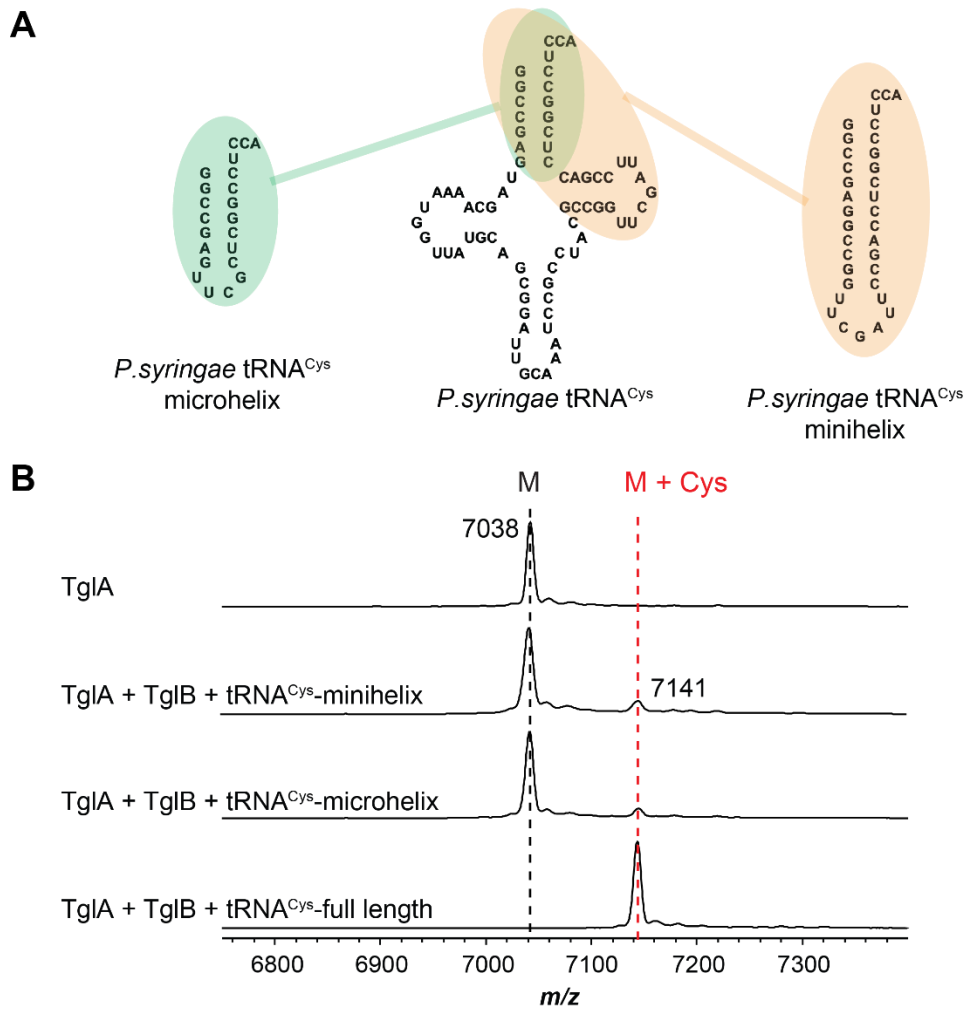

**Figure S3. *P. syringae* tRNA<sup>Cys</sup> mini- or micro-helix is sufficient to catalyze the in vitro cysteinylated reaction.** (A) Secondary structure of full length *P. syringae* tRNA<sup>Cys</sup>, and its mini- or micro-helix. (B) MALDI-TOF-MS analysis of in vitro cysteinylated reactions with *P. syringae* tRNA<sup>Cys</sup> mini- or micro-helix under standard assay conditions. (TglA, calc. [M+H]<sup>+</sup>, 7037; TglA\_Cys, calc. [M+H]<sup>+</sup>, 7141).

**A**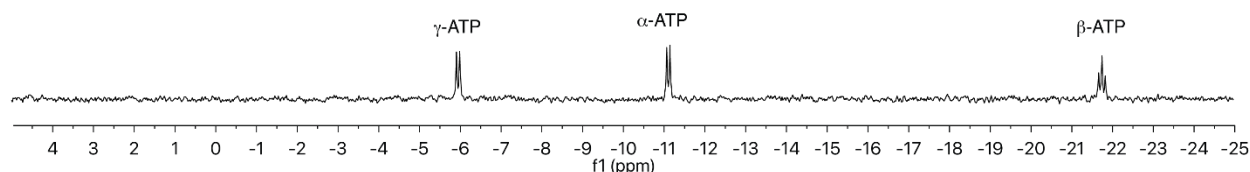**B**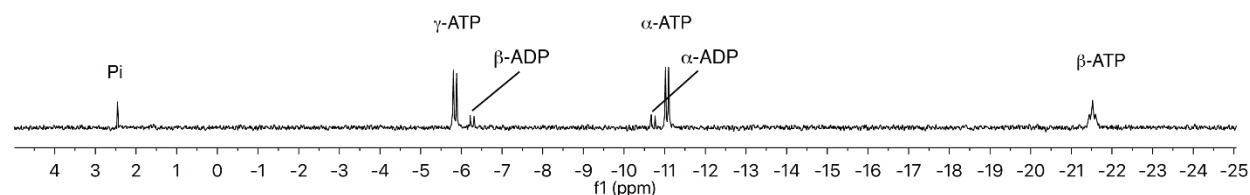**C**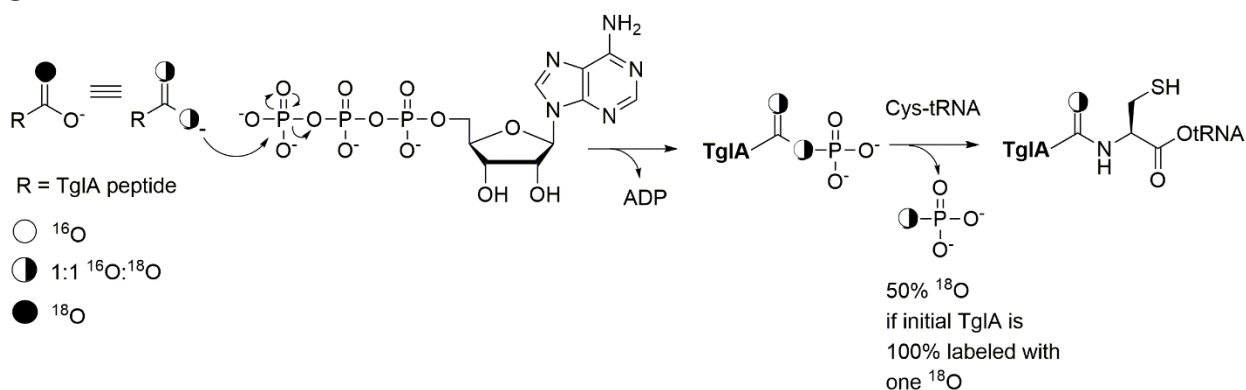

**Figure S4. TglB hydrolyzes ATP in the absence of substrate TglA.**  $^{31}\text{P}$  NMR analysis of 500  $\mu\text{M}$  ATP incubated in HEPES assay buffer (100 mM HEPES pH 7.5; 5 mM  $\text{MgCl}_2$ , 100 mM NaCl) at 30  $^\circ\text{C}$  for 30 min in the absence (A) and presence of 50  $\mu\text{M}$  TglB (B). (C) If TglA was 100% labeled with one  $^{18}\text{O}$  at the C-terminal carboxylate, then upon phosphorylation 50% of the label would be in the carbonyl group and 50% in the bridging oxygen of the phosphate ester. Upon attack by the Cys-tRNA, this would lead to 50% of labeled phosphate. Using the same reasoning, when 85% of TglA is labeled with one  $^{18}\text{O}$ , then the phosphorylated peptide will be 15% unlabeled, 42.5% labeled in the carbonyl oxygen, and 42.5% in the bridging oxygen, and hence after attack by Cys-tRNA ~42% of the released phosphate would be  $^{18}\text{O}$  labeled, as mentioned in the main text. 42.5%  $^{18}\text{O}$  and 57.5%  $^{16}\text{O}$  corresponds to a calculated ratio of 1:1.35. The observed ratio was 1:2  $^{18}\text{O}$ : $^{16}\text{O}$ . However, a significant amount of  $^{16}\text{O}$  arises from hydrolysis of ADP to phosphate and AMP as shown by NMR analysis (Figure 3). The fraction of the total phosphate that was derived from ADP hydrolysis was estimated by taking the difference in integration of the phosphate peak and either of the two ADP peaks (it was harder to integrate the AMP peak which was overlapping with other peaks). This amount of phosphate produced from ADP hydrolysis was subtracted from the total amount of  $^{16}\text{O}$ -phosphate observed to arrive at the amount of  $^{16}\text{O}$ -phosphate produced from ATP. This correction leads to a ratio of  $^{18}\text{O}$ : $^{16}\text{O}$  of 1:1.4.

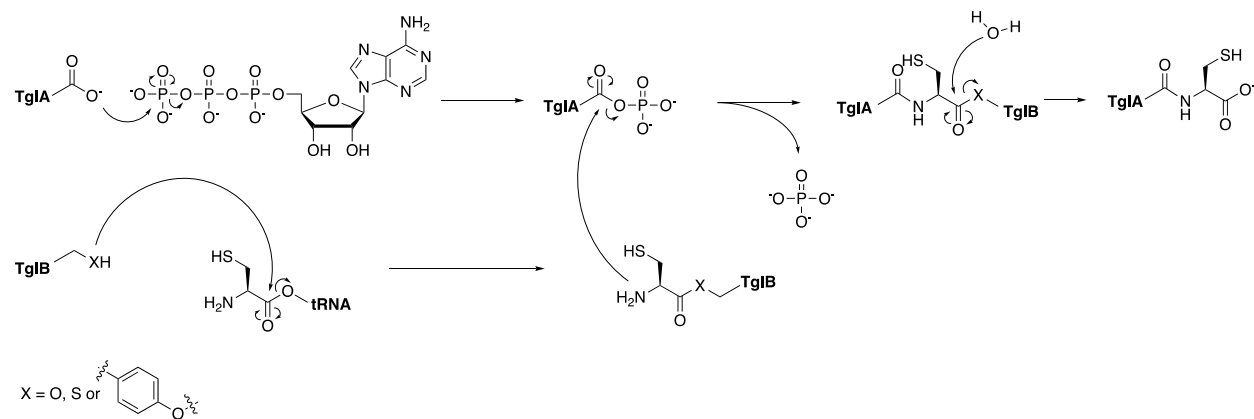

**Figure S5. Potential ping-pong mechanism involving the formation of an aminoacyl-enzyme intermediate.** The amino acylated tRNA first transfers the amino acid onto a residue of TgIB. Then, the amino group of the tethered amino acid attacks the activated TgIA peptide. Finally, hydrolysis of the protein-peptide complex releases the product.

WP\_010898205.1 MIISISNLSPKSNRSQTKDSQISKWSYFSDCILRSTGFPFAEWIEKLCFHKTTFMFDLCYR  
 BAB05753.1 -----MWFNTSTWRWLKPFVLRSTSIPIEMVNLNRLKESIKQLNEWSK  
 WP\_102649326.1 -----MSLSSFFW-----MRSAGFPISWLERFAVRLDEAQVARLHA  
 WP\_110653318.1 -----MESSQYFW-----LRSTGFPIHHLTDLGRFADLPACRVFEQ  
 WP\_048368865.1 -----MESSQYFW-----LRSTGFPIHYLTDLGRSELPAACRAFEQ  
**Tg1B** -----MESSHYFW-----LRS TGFAVHHLTRLGKMAELPLLKDFET  
 WP\_117166554.1 -----MESSLYFW-----LRSTGFPIHHLTQLGKMDLPLLKDFED  
 WP\_112718210.1 -----MKCSDYFW-----LRSTGFPIEELISLTDLPNLPHFNDYYM  
 WP\_095098125.1 -----MRCADYFW-----LRSAGFPADQLMQATSFPPLPAFTSLM-  
 CUW02180.1 -----MKCADYFW-----LRSAGFPADHLMQVSPFNSLPAFTLLME  
 : : : : \*\* : : :

WP\_010898205.1 TEQSLNELVERLKTLEQTCHIPSNAQDWQRIRKLVGKRKKVTDEFIHLMEQKGFDDQSLT  
 BAB05753.1 SQQSFDQWCNHWIKERSVPERISLPHQRKVIRIKKRNPLTEQDKIIVTKWGMKELID  
 WP\_102649326.1 LTESIEARIARIREGLL-----AGSPVALKVVRKLTGEMPLTAKDWPADQALAAAELE  
 WP\_110653318.1 DFRSLQTLKATLLEKAKA-----HSPQACRKFIRKLNENQALQPTDLPEVLRPELGEALQ  
 WP\_048368865.1 DFRAFQALKAMMLEEANS-----HSLTTCRKLIRKLNQSLLSLSDLPQALREPLNTAVL  
**Tg1B** DYRSNLTLRDSLLEKISIS-----HSSQACRKLIRKLNENLPLQVSDLPEALRDDAVDELA  
 WP\_117166554.1 SYRCVAVLRSKLLQKSMS-----HSAQASRKLIRKLNENLPLQVSDLPEALRESSREDLE  
 WP\_112718210.1 LVGQAQTIKANLKTQLE-----FGEQSSRNFLRKLNDGEQLSIRVLPVELRGKLGDATE  
 WP\_095098125.1 ---ALHQLRGRLLQQFEQ-QMAVVGVEVQCRKFARKLAAQQAVSVSDLPPLRDLVQQLD  
 CUW02180.1 LYQ---WRGRLLQTFEQ-QMAIVGEEQCRKFARKLAAQQAVSVSDLPPLRDLVHQLPG  
 . . . : :

WP\_010898205.1 QEIESYERKRRLQEKNTKARESFEAEALAEKQLFLQEIYKNPRLQEAIFQOSSPSMYKNAV  
 BAB05753.1 ---EYCSQQQSLISLK-KKAQQSFHEEFERLQQQLIERFQSSQYELALYTLNHLKWHFWI  
 WP\_102649326.1 ---PLYAERAELTQLN-TALEASFAAAATRARGALFETLRDPLLEAVFLSNPSALER-V  
 WP\_110653318.1 ---HWNALLARTSAP---EEAAREYDAYLESARQGLIDFLDDEAVAEALFISNPSALTR-I  
 WP\_048368865.1 ---KWNDDLKRLVIG---DVARHEYSTYLERARQGLINFLDDEAVSEALFISNPSARAR-I  
**Tg1B** ---HWNERLGRLLKQR---VEVDQYAVFLESARQALIDFVNDEDEVEQAVFISNPTALTR-L  
 WP\_117166554.1 ---RWNEQLARLAQR---TDVDQYALYLEDARQALIDFLDDEDEVAQALFISNPAALAR-V  
 WP\_112718210.1 ---QLNQLQTTLAKMK-IDLDSDFSKYTEQTRQLIDFLDQPEISEALFISNPEACKR-I  
 WP\_095098125.1 ---EWHNVNAKIVAQE-TTLRPVFANFNEQGRQQLIDFLSRADVSEAFISNPDAQR-I  
 CUW02180.1 ---EWHSVNAKIEQE-TSLRSGFISFSEQVRQQLIDFLSRADVSEAFISNPDAQR-I  
 : . \* : \* : . :

WP\_010898205.1 VPYVHSSLQKRNTNIKRIERQLISYLQRLCTKNETTSFFGPIQYGVLTSEQ----QDIEY  
 BAB05753.1 KENRLENL---TDAQKQTCRTLFAYLQRVSTKNDTIGEYGPISYGAFN-----QGKLI  
 WP\_102649326.1 DTLAECSPERVDNMRQRLRLAWSYVQRCAKNDTTSFFGPIAWGEFAPADAAGGEAASF  
 WP\_110653318.1 RELIRDRHSRNSRKKQKRLRLGWSYAQRFCANNDTSSFFGPLAWGRFDTR-----QTANV  
 WP\_048368865.1 QELIKDRHSRNSRKKQKRLRLGWSYAQRFCANNDTSSFFGPLAWGHFKDQ-----QIANV  
**Tg1B** RELRQERHARTDSRKKQKRLRLAWSYAQRFCANNDTSSFFGPLAWGRFDRT-----QVEHV  
 WP\_117166554.1 RELIGERFSRTDSRKKQKRLRLAWSYAQRFCANNDTSSFFGPLAWGRFDRL-----QAENV  
 WP\_112718210.1 KSLVEGRAGFNDSRKKQKIRLGWSYAQRFCANNDTCSFFGPIWQGFAD-----QDALV  
 WP\_095098125.1 NALITERHAPHDSRKKQKIRLGWSYAQRFCANNDTCSFFGPIAWGRFDDR-----QTVLA  
 CUW02180.1 NTLVTERHTPYDSRKKQKIRLGWSYAQRFCANNDTCSFFGPIAWGRFDDQ-----QTMLA  
 : . . \* : \* \* . : \* : \* : :

WP\_010898205.1 NFNQKE---TERRAFMPYWSIKVLAAQMKCEDVFFPYLNVKLSYQYTKTGDSIHSPILE  
 BAB05753.1 QTRQ-----ITKRKAYFAYQGLQKLLSVIKKD-----LMPQ-A  
 WP\_102649326.1 EVDFGEGGWIGERTYFEHWVISRVAMAMSEDPVLAATLPTSLSPACALIEGALHAPG-N  
 WP\_110653318.1 HLTQDDTAWIKDRHTFFENWVVQRLVEQINQQCPDIDLMLQLNTGCYLHEQTLFMP-I-G  
 WP\_048368865.1 QLTQNDTTWLKDRHTFFENWVMQRLVEQINQQCPNTDCMPLKLNASCYLREQHLFMP-I-N  
**Tg1B** RITQHGPWIRERHTFFESWVQRLVEQLNRHCVDVQFMPLQLNPGCFNLQDTHLHPV-N  
 WP\_117166554.1 RITSGEGSWIKERHTFFESWVIQRLVDQLNKQCPDPHFMPFQLNQGCYLIIDTTLHMPV-N  
 WP\_112718210.1 EVNHAEGNWLRSRKTFFESWVIQRIIGQLNEQCPDANKVPLMLNTGCVLVDVDFYPL-E  
 WP\_095098125.1 NVKWSMGSWLSQRKTFESWVIQRIIGQLNEQCPDANKVPLMLNTGCVLVDVDFYPL-G  
 CUW02180.1 NVNRSTGPWLSQRETFESWVIQRLVAQVNAQCPEPACLPLSVNPGCYLQGDVLDVHYPL-D  
 . \* : : . : : : \*



WP\_010898205.1 KMKVFKPKPYADI IKHLT---YENQSI EQ LAKKL---SQPVAVLAKKLRLLLEKKRLILIEI  
BAB05753.1 HAWNLPSSSTVD-----GW  
WP\_102649326.1 RRIAVD GALRAVLEEELEAARAHGIKRDVLRERCVARGLTEQSVDA AIDSVLAKGIASRGV  
WP\_110653318.1 KSRQLN PQT AQVLQY ISEHQGRAATCAGILNNC--PQDAAGTLRDLLEHLVSKRIVRRGW  
WP\_048368865.1 KSQRLT PLTAQV LHTINAQH KEDVTFKQILNAC--SDI SPYTLRDL LDH L VNK R I VRRGW  
**Tg1B** KRRQVSALTARVLGY IQCQSAVAPT LFG LQAEL--QDVSAGQLRDL IDH LVAQQIVRRGW  
WP\_117166554.1 KRQTLN PLTAQVLDY IQRPASSAPT FYGLLAAL--PQADAGQLEALLEHLVARQI IRRGW  
WP\_112718210.1 KSRQLSGDMLNIVRL LQ-HHAHVYNCD SLLAKL---MIDNDV---ALKRLIDAGI IKIGF  
WP\_095098125.1 KSRRLTGPTFDVLKALT---MAVVSEKQLRDRL---DNNPGQ---VVKHLISAGIVQRGF  
CUW02180.1 KSRRLAGP ILEV LKALT---LEV VSEKQLRHRL---NSDPGP---VVEHLIGAGIVQRGF  
. .

WP\_010898205.1 PLSITEPDSLNELRSWILKIKDVEHPDLSLWQERLEWLWKVKQAYPYMTL-GQKQELFHK  
BAB05753.1 KL-VRER-----VEDCNDPRSEI WIRILDQLEETRHLFETSTQPNEKEQALAQ  
WP\_102649326.1 RIAAGLADPLGALRAY-LAHL DAGHPRTFRWFELFESLERERLRFATGGL-DERRAALAD  
WP\_110653318.1 QMSPRERHPIVQLQRC-LANAGVSDPFNQLWQSRLEALEGLRRDYAHGDL-MRTECLER  
WP\_048368865.1 DISPRERNPIVRLQHY-LATTGVS PDFQKAWSRLHALEQARCDYANGDL-IRTEILEK  
**Tg1B** QISPRERKPVQVLHTF-LADARLSDDFRTQWHERLSGLEAIRQDYATGDL-AVRIASLDK  
WP\_117166554.1 QVSPRERQPVQVMSLF-LSDSRLSDAFRAQWRERLETELEATRNR YALGDL-SVRMASLEQ  
WP\_112718210.1 VLSPRVENPLKALADK-LVDAKLPTDFTQQWLNTFTELESQREAYASGSL-EQRQIALVN  
WP\_095098125.1 QLSPRDPAALTTILEA-MRTAALPERFVAHWSECFQRLEQRRETYAGGDL-QQRQQALAA  
CUW02180.1 QISPRDPAALTTILQA-MRTATLPDSFIAHWSECFRCLEGQREIYASGDL-HQRQQALVA  
: \* : \* . : . :

WP\_010898205.1 LESTFTEWTGEQPRRLGGEIYADRNLLEYECHGPLNNIKIGGS IKHVLKQDVPKWSICA  
BAB05753.1 AEKLF T NITGEAFQGENQQYFADKTL LFEEAHDQQ-YLPV--T LSVDLWTELDHALLIHA  
WP\_102649326.1 CETLLAE-NGIDVSREQ GKMYVGRFPFYEDCARNV-RVRIGGALRRAIDTELVPLMALYD  
WP\_110653318.1 LNQLLGE-AGVDLSRETGAMYVGRYPLYEDCSRNM-NISLGQAML DQVNQELAPLMRINQ  
WP\_048368865.1 LNRL LGE-AGVDLCRESGTMVGRYPIYEDCSRNI-NISFGQTVFHQVNKELAPLMRINQ  
**Tg1B** LNRL LGE-AGVDISRESGAMYVGRYVYEDCSRNI-DISLGGALLDQVNADLAPLMRIHQ  
WP\_117166554.1 MNLL LSE-AGVDLSRESGAMYVGRYPVYEDCSRNI-EVSLGRS LLEQVNADLAPLMRIHQ  
WP\_112718210.1 LNNLLSA-ANVSLRS SSGEMYVGRYPVYEDCSRDT-QVSNQTIKKHIEEDFTPLILLYQ  
WP\_095098125.1 MNQTLSD-AGVSLARDSGKMYVGRYPVYEDCARAS-TLTFNRK LQQALD VDFAPLMSLYQ  
CUW02180.1 MNQALSD-AGISLVRESGKMYVGRYPVYEDCARAS-TLTFSRMQQALDED FAPLMSLYQ  
: : . :... :\* : . : : : :

WP\_010898205.1 KHGEQRRKQE QALAQE I FKMMPNEDSVP--FLKFVHDL SNHPDV-----HTWEK  
BAB05753.1 KLRLDIWRSWQNI AVQKFEQLANGNVSIP--LMKWVSYWLRYP PSLDNQ SATD LLSFPW--  
WP\_102649326.1 RLAGAIAAQLSAAVYRI---RAEGDVAVRHDL LSFARELQRHRVA--EEVATLRPLLRRA  
WP\_110653318.1 WLKAI AHQLNQAFIEVWEQRQVANPGKPVDFDL LNTLAPLLPALEARIIGDL DQCLET  
WP\_048368865.1 WLKAI AHQLNSVFEAWEQRQAINPCRTVD FDLINTLAPLLPAIETS IIVDLNQRLET  
**Tg1B** WLKACARQLHG FYAQVWQRLQAEDEHNPNVFLAFLGAVQPVI AHAEAGIIEELDAVLAD  
WP\_117166554.1 WLKACARQLHAFYVEVWQGFQAADAAAPVDFLAF L GAVQPRLAQVEANI IERTDALLDQ  
WP\_112718210.1 WLTRVTAYELHQHWLGWVWSQCCSEYDTDELN ILTFLNALKPLQDDIGQQVQTRITTVLQQ  
WP\_095098125.1 WLTRATGVLLHQAWLDVYQLIPPCPDGQDVSL LAF LHLHPQQA IQQQVCDVRVTMLNE  
CUW02180.1 WLTRATGVLLHQAWLDIFQLIPSRKDGQAISLLAF LHLRHPQQATIQQQVCERIRGMLNE  
. : :

WP\_010898205.1 RWQSIKTEIEEA-----ITHEVASNPKSVVHLSL-DYQDFDRDMAWLTS PDLMI  
BAB05753.1 -----LVDRNGY-----LSIKLPDRVIRSWRKEINSFR-----WLLSPDLMV  
WP\_102649326.1 AWSSVVADKQSI-----DGEITLDTSDLVRLVSAFEQAGLRASGPQLGTRVHSPDFLI  
WP\_110653318.1 AWAQLLQDFPGH-----AEVRLCAADVERLISLLNTRL-DVEGFVFGSDFHSPDILL  
WP\_048368865.1 AWTQLLREFPAQ-----SEVRLCATDIDHLISRLNKDF-DVSDFTVFGSDYHSPDLLL  
**Tg1B** AWQQVLSDKHDP-----EQVQLTHE DIERLIVELNTRL-DVRTFSVFGSHFSPDFLI  
WP\_117166554.1 AWQQVLEGRAEE-----AQVHLSAADVERLIEMLNARL-DVQAFVFGSDFHSPDFLI  
WP\_112718210.1 SWGEILT TVDAKNENAVDSAEIQLTSDDFTVLMSYLNESC PDAQHFEVFGDAFHS PDMFL  
WP\_095098125.1 AWQP LLSVVHTE-----ELQLSAAQLEQVLAALNQCPAAADFPVFGDDFHS PDMFL  
CUW02180.1 AWQP LLSVVRTE-----EVQLSAEQLAQVLAALHQCPAAADFPVFGENFHS PDMFL  
: \*\*\*:::

WP\_010898205.1  
BAB05753.1  
WP\_102649326.1  
WP\_110653318.1  
WP\_048368865.1  
**Tg1B**  
WP\_117166554.1  
WP\_112718210.1  
WP\_095098125.1  
CUW02180.1

AKKDDDS-----YQVILGEIHDTIMVW--GWALQFHPEKDRVNEQLVKKIQKSTQHLRML  
-KGFETNRFNVAIVIGELHHGFTA--DGWMFEFHPDKKEINRIV-----RQA  
AAGSVDAIREGRFDLVI GEVHPTVHTVSQPVAQPFQYQDSVRDEVSDTLGNS----RMV  
SSASVEAFNRGDYQIIVGEVHPAVHTLSQPVAAPFGPFNTQINQQVEAIFQRP----RLV  
SSASIEAFNLGHYEIIVGEVHPAVHTLSQPVAADPFPGPYNSQICQQVETIFQRP----RLI  
SSTSTDALNQGQDYSIILG**EVH**PGVHTLSQPVAEPFGPFNKEIEQEVRQIFDGP----RLV  
ASSSTQALNQGQDYEIILGEVHPGVHTLSQPVAEPFGPFNHDINRDVQRLFQGS----RMV  
SASSQEALNAGDYHLIIGEVHPAVHTLSQPVAAHFSPFNQQINAEVKSLSFSSP----RLI  
AADNLEALNRGEYQVVLGETHPGVHTLSQPVAAPFCPVTAIEIDQGVNALLGRE----RLI  
AADDLEALNRGEYLVVLGETHPGVHTLSQPVAAPFCPTAEIEQEVNALLGRE----RLV  
. : : : \* \* . . \* \* : : \*

WP\_010898205.1  
BAB05753.1  
WP\_102649326.1  
WP\_110653318.1  
WP\_048368865.1  
**Tg1B**  
WP\_117166554.1  
WP\_112718210.1  
WP\_095098125.1  
CUW02180.1

NMLSSKRFKIVPFEPGT-----TIQMNSFSNSPNEKIPLSQLKVITYTKEGLALTLF  
MPEKNPSFTWAN--WIFQRKMKSTPQEYPGVSVKLTGHSEYPDEKSFSLYDLEVRRLGDK  
AADSSTYQRSHIDWLDVPELWQV--EMPGASARVPGERRVPAARLRLIEREGTLFVEDR  
LADSPESYQRSHIDWLPQPSYLQL--VLPSSGGGCVAHQQAAGRAKVLRMNGRLQVQVDA  
LADSPDSYQRSHIDWLPQPFYLQL--VLPSSGGGCVEPHQQAAGRAKVLVFNGLRQVVDI  
LADSPDSYQRSHIDWPLLECYQQL--ILPSSGGCVPADQRFVAVGRARLVNMEGRRLVEDI  
LADSPDSYQRSHIDWPLLSYCYQQL--VLPSSGGCVPDQRFVAVGRARLVMLQGRHLHVEDV  
LADTPTSQRSHIDWPIINNYQQL--ILPTGGGCVALANQFSAGRAQIVLVDGRLRVTDI  
LADSPESYQRSHIDWPLVSHYVQL--ILPSSGGSVAAEKRYPAGRARLHCKTGRLTVEDM  
LADSPESYQRSHIDWPLVPHYAQL--LLPSSGGSVAAEKHYVGRARLHCKAGRLTVEDM  
. : : : . . . . :

WP\_010898205.1  
BAB05753.1  
WP\_102649326.1  
WP\_110653318.1  
WP\_048368865.1  
**Tg1B**  
WP\_117166554.1  
WP\_112718210.1  
WP\_095098125.1  
CUW02180.1

D-----HEEVFYTYN-----GELNMTVHSFFSLPRAVSFSIRTGESTPRLMLGDLVVQR  
VAVFLQGTDNALMFYPPAYGFNETSFFPFALFCSMPMEPSSNSYKGRHKAIKLGNVTLIR  
ASGL---VEHLLTVLP-----GDFHRAAFAL-----AADVLGAGIAERIRLGHITLKR  
LGQF---SEDLLCVYS-----TPLHRLGFAL-----AGSAVAKHDHRRRIWLGRTLYKR  
LGQF---SEDLLCVYP-----TPLHRIGFTL-----ADSAVAKHEYRRIWLGRTLYKR  
AGQF---SEDLVCVY-----TPMHRIGFAL-----AGSVVAKNDRRRIWLGRTLYKR  
AGEF---AEDLLCVYS-----TPMHRIGFAL-----AGSAVARGDRRRIWLGRTLYKR  
LGYF---NEDLLCVHN-----TQLHQLLFDL-----AGDII PRHECRRILFNRSIYKR  
DGAF---HEDLLCVSG-----TSLHQLLFDL-----AGDVLPRHEPRRIRVNRTLYKR  
DGAF---HEDLLCVNS-----TALHQLLFDL-----AGDMLPRHEPRRIRVNRTLYKR  
: . : . . . : .. \*

WP\_010898205.1  
BAB05753.1  
WP\_102649326.1  
WP\_110653318.1  
WP\_048368865.1  
**Tg1B**  
WP\_117166554.1  
WP\_112718210.1  
WP\_095098125.1  
CUW02180.1

AKWHISKQDVWSKKHKTGSSIELFYEAYRFHLKESLPKEGFALPGQPKPVYVNFYSYFLI  
EHWVFEPTDWEVHASLDGFGQMACLQEIIVKYQLPQVGYLRFSEQLKPVWFDNPNFCV  
RTWTLQASALPIAERVGESMPAFLAWRRWADALGLPRHIFVKADTEPKPVFVDFDCPLSL  
ASWLFARDRLPEPKGSIDELEHTLQWRRAWAGHGLPRYAFVKIDTEPKPLFLDFDNPLSF  
ASWLFRTREQLPEPKGTIELEYTMQWRRAWAVSQGLPRYAFIKIDTEPKPLFLDFDNPLSL  
**ASW**WFSPEQLPCSEFSVDKLDLAWRAWAVEHGLPRYVFA**K**IDIE**K**PIFIDFNPLSL  
ASWWTQEQFPCEFSVDKLDLAWRAWAVEHGLPRYVFAKIDIEPKPIFIDFNPLSF  
RTWSFESSDWPVS--SKDELGLFVQWRLWKDKYQMPRWIFVKCDSEPKPFVDFDNPLSL  
RTWAFNAGGWPEA--VSDEFMAFIQWRDQQRQALPRWVFIKCDSEPKPLFIDFNPLSL  
RTWAFNTGGWPEA--VSDEFMAFIQWQEQQRQALPRWVFIKCDSEPKPLFIDFNPLSL  
\* : . : : \* . : . : \* . : . :

WP\_010898205.1  
BAB05753.1  
WP\_102649326.1  
WP\_110653318.1  
WP\_048368865.1  
**Tg1B**  
WP\_117166554.1  
WP\_112718210.1  
WP\_095098125.1  
CUW02180.1

EMLEGLWPDGENCTFSEMLPNLSELWLSKEDQKTHTAEIRLSY---FVERS-----  
DLFFNMAKKAEWFTFSRMDPGVEDLFL-KDDRGHYCCELRTFA---YRQEITSKDMMLG-  
DALTSVSARAQTLGISEMLPAPHQVWL-ADERGAFCAEFRTSIAGMGDEGAQSHSPQQH  
DGIINALKSNAGHVKFSEMRPCDELWL-EEARGRFCCERTTF---STCEALAT-----  
DGIINALKSAGHVKFSEMRPGDELWL-EDARGRFCCERTTF---SINKALAT-----  
DGVNSMCKKAGHV**F**SEMCPAPDQWL-EEARGRFCC**E**IRTTF---RDNGVTRDE-----  
DGVNSMCKKATHV**F**SEMCPSPDELWL-EEARGRFCCERTTF---TSDGVVPDEQ----  
DALVSALKKAKVIRVSEMLPDPNALWF-ADKRGKFAEIRTSMIISDNNKPVSEQYE--  
DALATALKKARVIQVSEMLPTDELWF-NDARGRFCCERTTF---SPIKQETTENAE--  
DTLATALKKARVIHVSEMLPTDELWL-NDTRGRVCCERTTF---SPIKQEAENAE--  
: . . . \* \* \* : : . . \* \* \*

```
WP_010898205.1  -----  
BAB05753.1     -----  
WP_102649326.1  EEALP  
WP_110653318.1  -----  
WP_048368865.1  -----  
TglB           -----  
WP_117166554.1  -----  
WP_112718210.1  -----  
WP_095098125.1  -----  
CUW02180.1     -----
```

**Figure S6. Sequence alignment of TglB homologs.** The protein sequence for TglB was used to identify homologs via BLAST search. Homologs with E-values  $< 1E-39$  were aligned by sequence with MUSCLE (Multiple Sequence Comparison by Log- Expectation),<sup>1</sup> and highly conserved residues were targeted for alanine replacement. Shown in red are residues replaced with alanine for enzymatic activity assessment in this study.

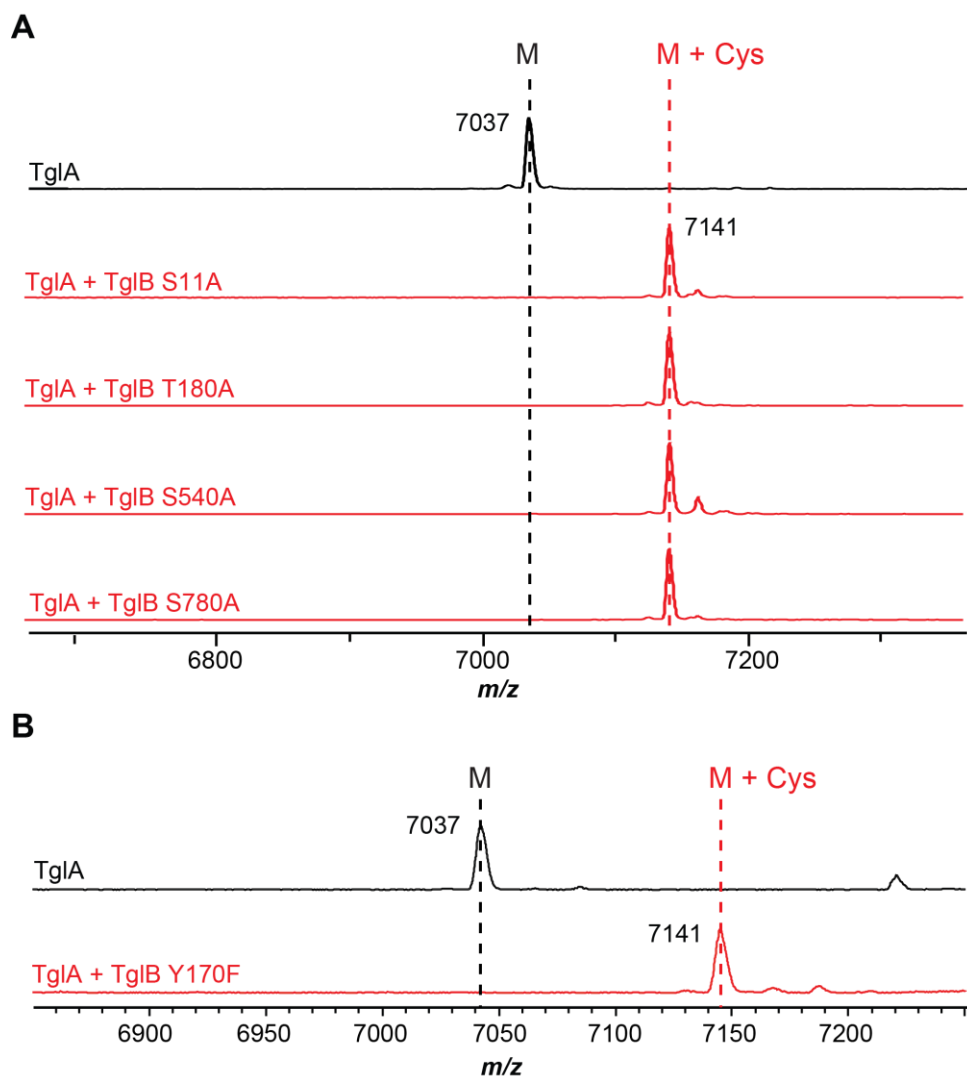

**Figure S7. Mutagenesis of selective Ser, Thr and Tyr residues of TglB does not support the ping-pong mechanism in Figure S5.** MALDI-TOF-MS spectra of TglA co-expressed in *E. coli* with TglB variants in which selective (A) Ser or Thr residues were replaced with Ala, (B) a Tyr residue was replaced with a Phe. All experiments were done under the standard TglB assay conditions.

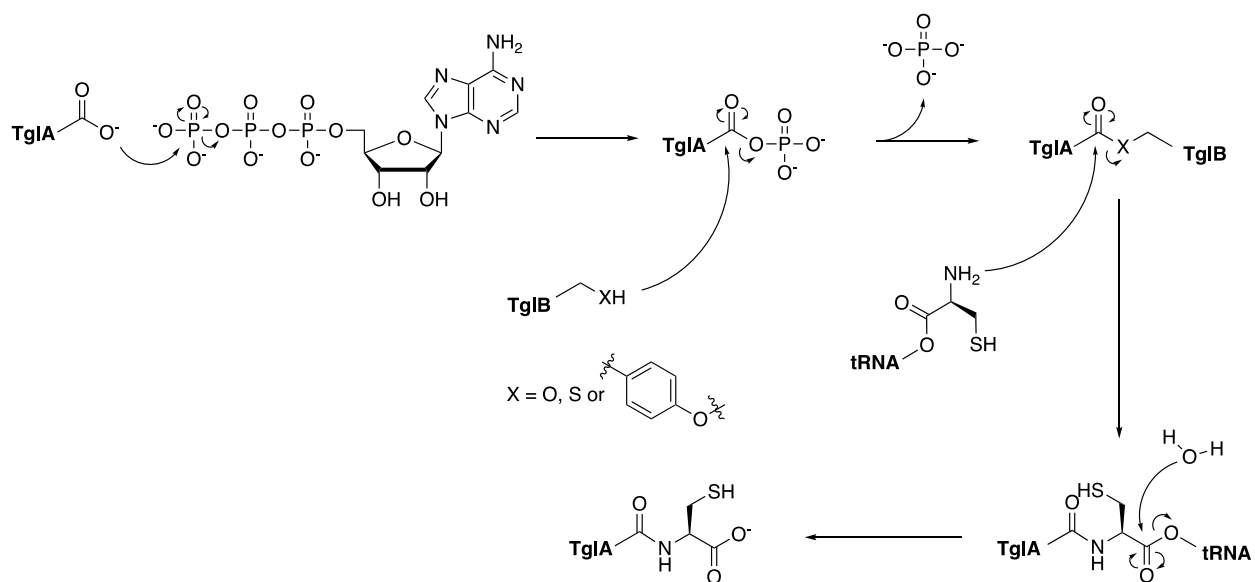

**Figure S8. A potential mechanism in which TgIA is covalently linked to a hydroxyl group on TgIB.** In this mechanism, the C-terminal carboxylate is first activated by ATP through phosphorylation. Then, a hydroxyl group from a side chain of a residue on TgIB attacks the activated carboxylate to load the TgIA peptide onto the protein via an ester that in turn can be attacked by the amino group of the cysteinyl-tRNA. Subsequent hydrolysis of the tRNA would produce the final product.

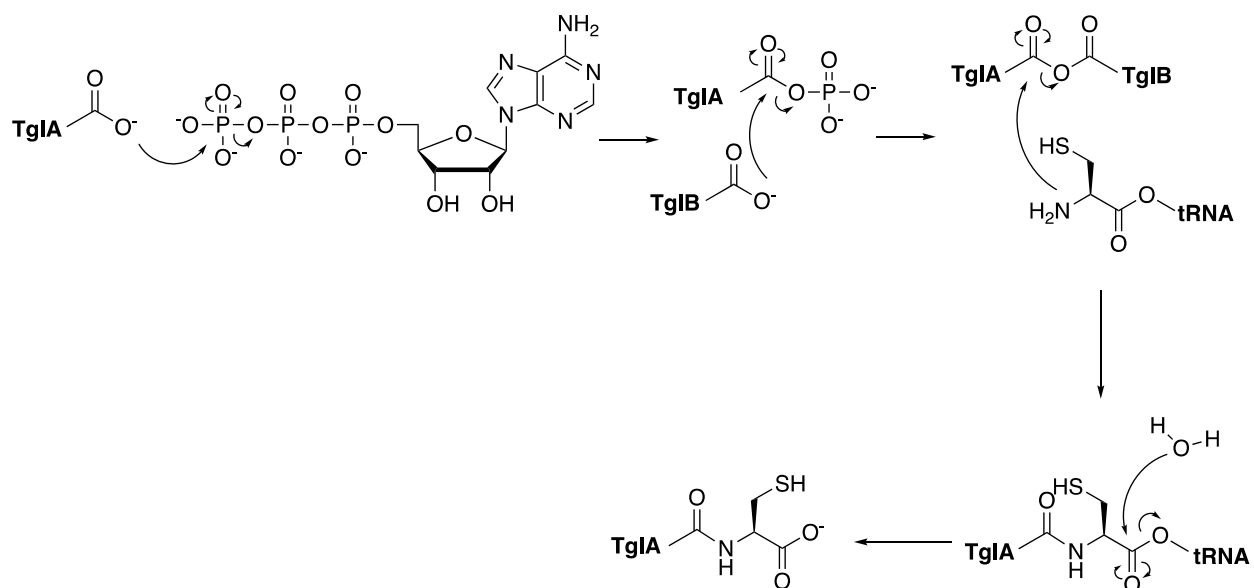

**Figure S9.** A potential mechanism in which the C-terminus of TgIA is first activated by ATP, followed by attack from a carboxylate residue on TgIB to form an anhydride. Attempts to trap such an intermediate with hydroxylamine or sodium borohydride were unsuccessful.

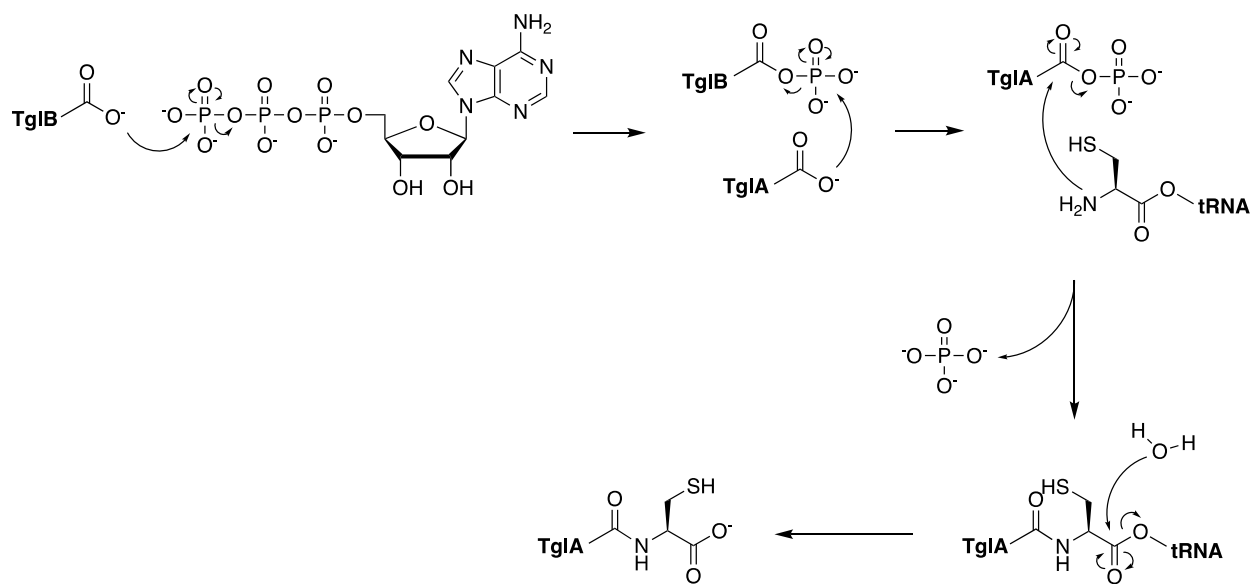

**Figure S10. A potential mechanism with a covalent acyl-phosphate intermediate.** In this mechanism, a phosphate group is first transferred from ATP onto a carboxylate containing residue on TglB, before further reaction with the TglA peptide.

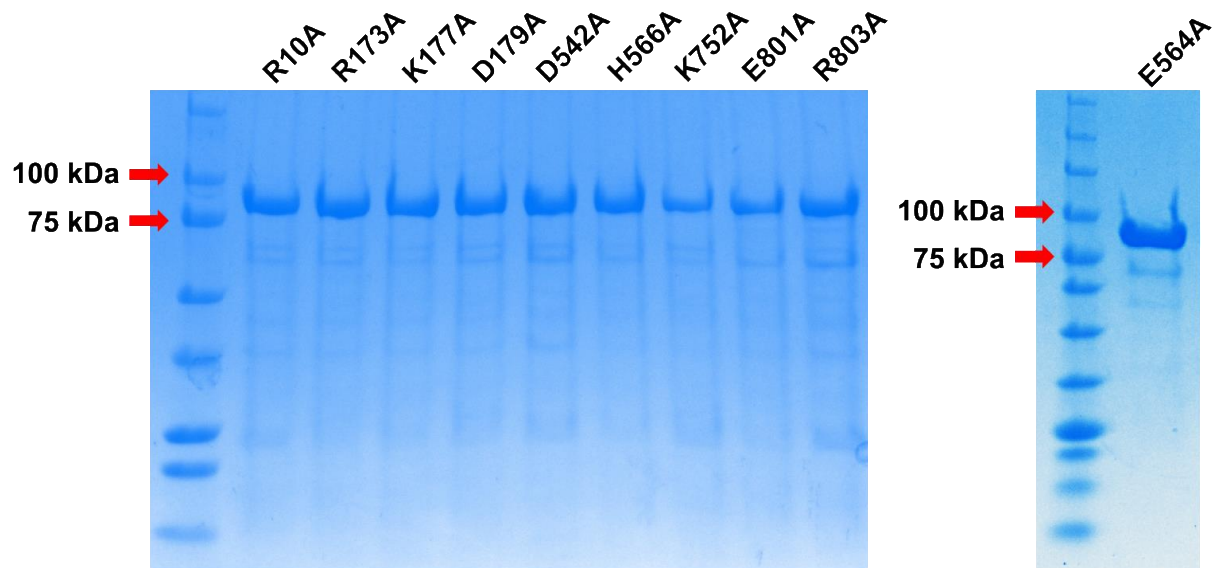

**Figure S11. SDS-PAGE analysis of TglB variants with diminished activity.** All proteins were expressed as N-terminal His<sub>6</sub>-tag fusions.



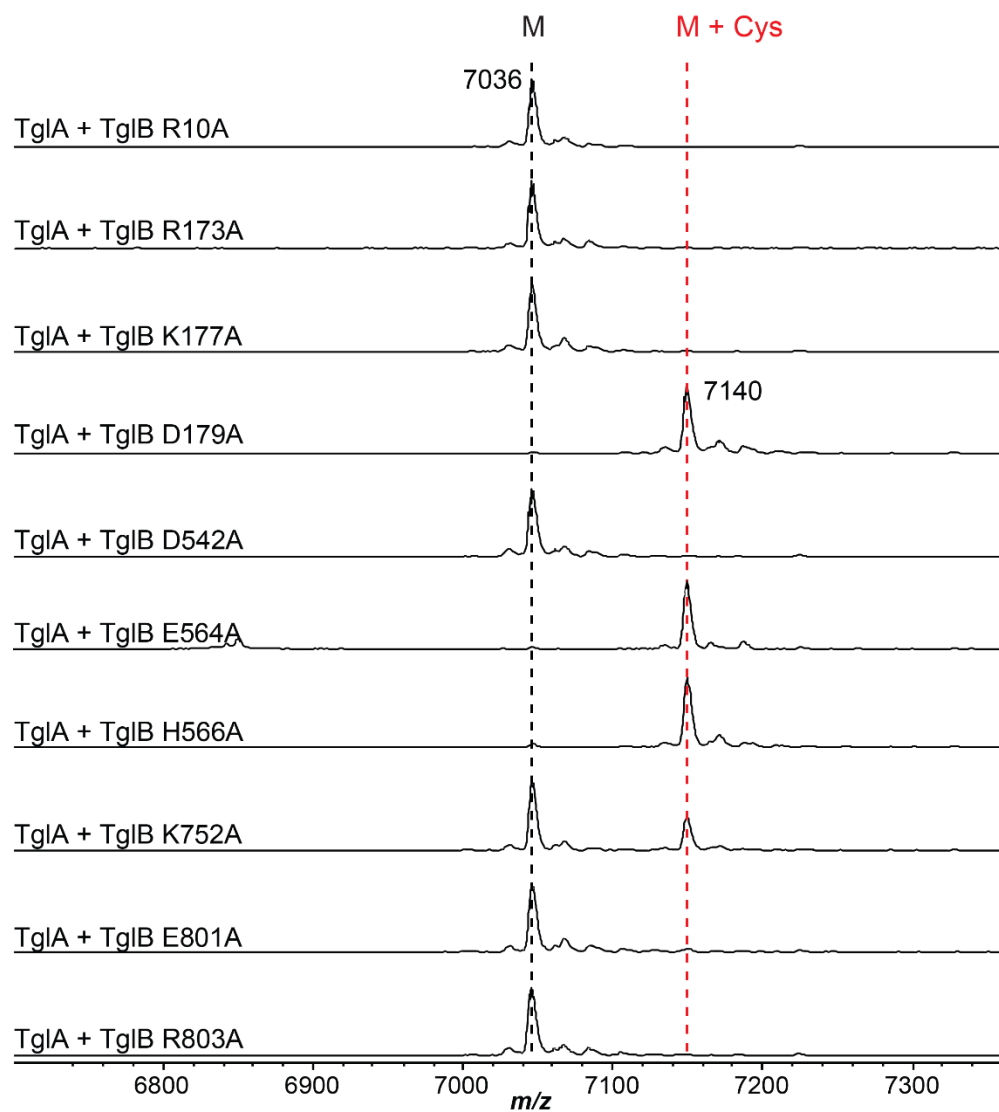

**Figure S12. MALDI-TOF-MS spectra of in vitro cysteinylated TglA with TglB variants.** The in vitro activity of each TglB variant mirrors the activity observed when co-expressed with TglA in *E. coli* (Table S1). All experiments were done under the standard TglB assay conditions.

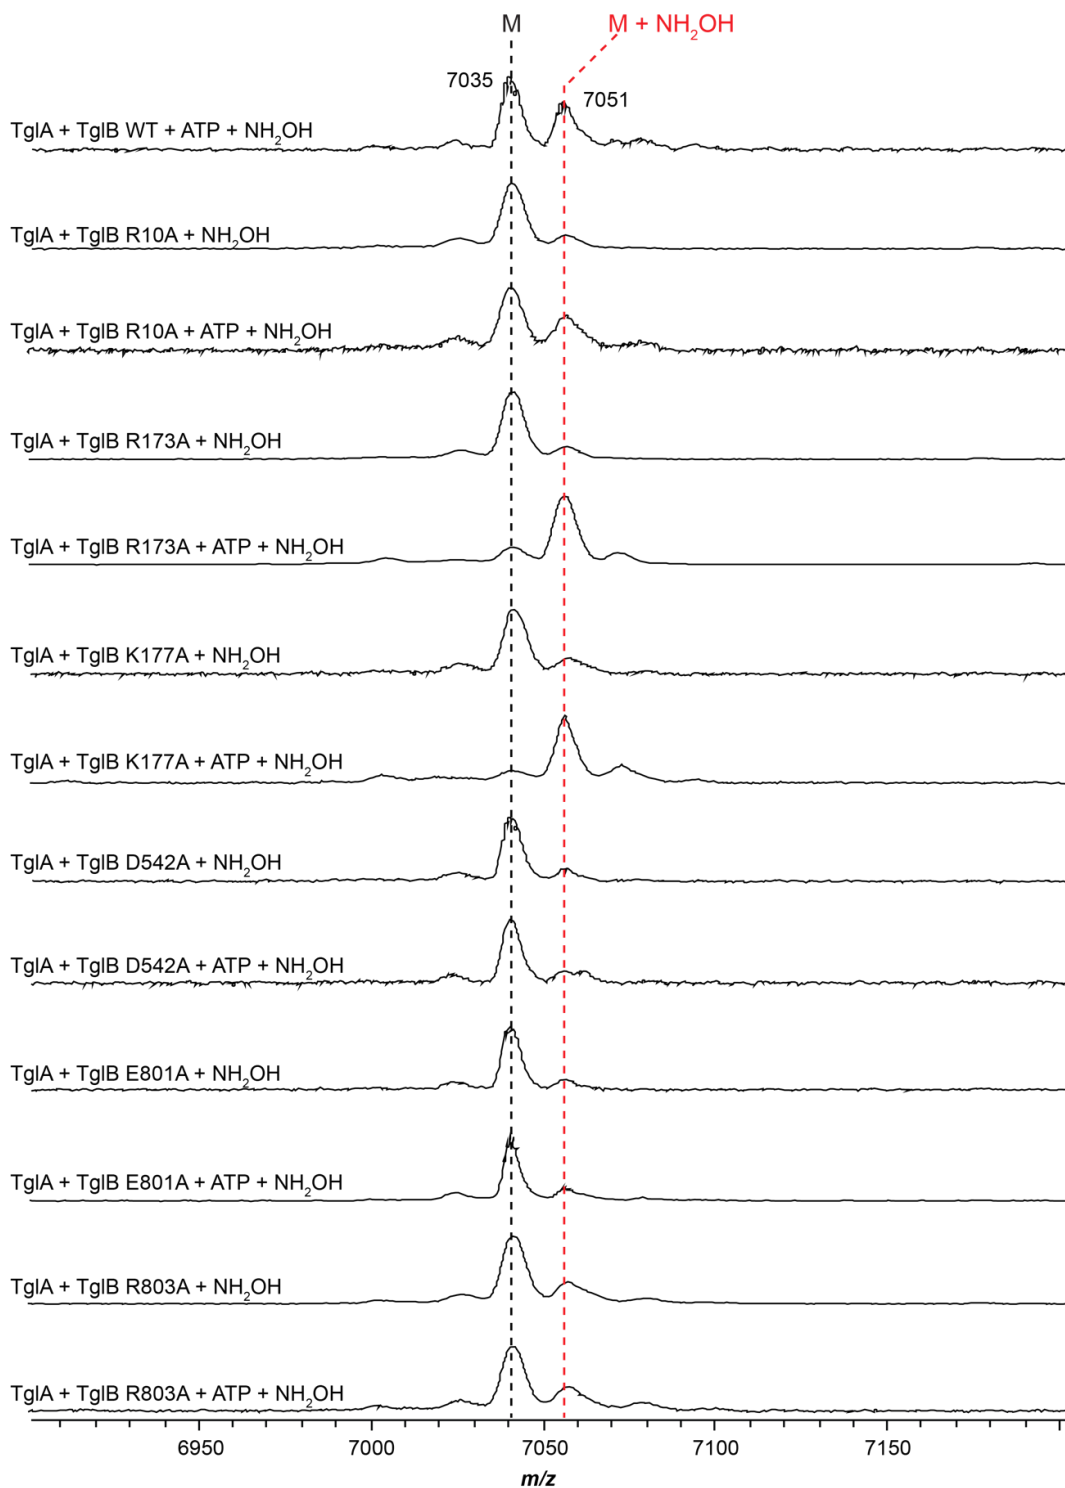

**Figure S13. MALDI-TOF-MS spectra of  $\text{NH}_2\text{OH}$  quenching assays with TglB mutants that do not conjugate Cys to TglA.** (TglA, calc.  $[\text{M}+\text{H}]^+$ , 7037; TglA\_NHOH, calc.  $[\text{M}+\text{H}]^+$ , 7052). Assays were performed by reacting 50  $\mu\text{M}$  TglB and 50  $\mu\text{M}$  TglA in the presence or absence of ATP (5 mM) for 5 min at 30  $^\circ\text{C}$ . Then assays were quenched with  $\text{NH}_2\text{OH}$  to a final concentration of 1 M and incubated at 30  $^\circ\text{C}$  for another 20 min.

**Table S1. Activity of alanine-substituted TglB proteins.** Sixteen positions of TglB were targeted for alanine replacement by site-directed mutagenesis using the alignment of Figure S6. These proteins were assayed for enzymatic activity by co-expressing with TglA and analyzed using MALDI-TOF-MS. +++ indicates enzyme activity roughly equal to wild-type (full conversion to product); ++ indicates modestly reduced enzyme activity (>50% conversion to product); + indicates severely reduced enzyme activity (low but detectable product formation); - indicates no detectable enzyme activity (no observed product formation).

| TglB Protein | Relative Product | TglB Protein | Relative Product |
|--------------|------------------|--------------|------------------|
| Wild-type    | +++              | D404A        | +++              |
| R10A         | -                | D542A        | -                |
| K161A        | +++              | E564A        | ++               |
| Y170F        | +++              | H566A        | ++               |
| R173A        | -                | R704A        | +++              |
| K177A        | -                | W707A        | +++              |
| N178A        | +++              | K746A        | +++              |
| D179A        | ++               | K752A        | +                |
| R397A        | +++              | E801A        | -                |
| E403A        | +++              | R803A        | -                |

**Table S2. Oligonucleotides used in this study.** All sequences are provided 5' to 3'. Lowercase m indicates 2' *O*-methylation of the following residue; methylation suppresses random addition of bases at the end of the RNA by T7 RNA polymerase.

| Primer                                   | Oligonucleotide Sequence                                     |
|------------------------------------------|--------------------------------------------------------------|
| TglA (-Ala)_F                            | GCAAGGTCTTTTGAAGCTTGC GGCCG CATAATG                          |
| TglA (-Ala)_R                            | CGCAAGCTTCAAAAGACCTTGCTCTCGATGACTTCAATGTC                    |
| <i>P. syringae</i> tRNA <sup>Cys</sup> F | AATTCCTGCAGTAATACGACTCACTATAGGCCGAGTAGCAAAATGGTTATGCAGC      |
| <i>P. syringae</i> tRNA <sup>Cys</sup> R | mUmGGAGGCCGAGGTCCGAATCGAACCGGCGTAGGCGGATTTGCAATCCGCTGCATAACC |
| TglB_Seq_623                             | CTGGATCAGAGAACG                                              |
| TglB_Seq_1549                            | GGCTGATTGTGCGAGC                                             |
| TglA_20mer_F                             | GAGAACCTGTACTTCCAATCCGCGTTGTTTGAAGAGTTTGACC                  |
| TglA R                                   | GGATTGGAAGTACAGGTTCTCCGGATCCTGGCTGTG                         |
| TglB_S11A_F                              | CTGGCTTCGCGCTACCGGGTTTTGCGGTGC                               |
| TglB_S11A_R                              | CAAACCCGGTAGCGCGAAGCCAGAAATAGTGTG                            |
| TglB_T180A_F                             | CAAAAAATGATGCATCGAGTTTTTTTCGGCCC                             |
| TglB_T180A_R                             | GAAAAAACTCGATGCATCATTTTTTGAACAGAATCGCTG                      |
| TglB_S540A_F                             | CACTTTCACGCTCCGGATTTCTTGATTTCCAG                             |
| TglB_S540A_R                             | GAAATCCGGAGCGTGAAAGTGGCTGCCAAATAC                            |
| TglB_S780A_F                             | GTCAAGTTTGCTGAGATGTGTCTCTGCTCC                               |
| TglB_S780A_R                             | CACATCTCAGCAAACCTTGACGTGCCCC                                 |
| TglB_R10A_F                              | CTATTTCTGGCTTGCATCGACCGGGTTTGCG                              |
| TglB_R10A_R                              | CGGTCGATGCAAGCCAGAAATAGTGTGAGCTTTCC                          |
| TglB_K161A_F                             | CAGCCGCAAGGCTCAGAAACTGCGCCTGG                                |
| TglB_K161A_R                             | CAGTTTCTGAGCCTTGCGGCTGTCAGTTC                                |
| TglB_Y170F_F                             | CCTGGAGCTTCGCACAGCGATTCTGTTC                                 |
| TglB_Y170F_R                             | GAATCGCTGTGCGAAGCTCCAGGCCAGG                                 |
| TglB_R173A_F                             | CTACGCACAGGCATTCTGTTCAAAAAATGATACGTCGAG                      |
| TglB_R173A_R                             | GAACAGAATGCCTGTGCGTAGCTCCAG                                  |
| TglB_K177A_F                             | GATTCTGTTTCTAGCTAATGATACGTCGAGTTTTTTTCGG                     |
| TglB_K177A_R                             | CGTATCATTAGCTGAACAGAATCGCTGTGC                               |
| TglB_D179A_F                             | GTTCAAAAAATGCTACGTCGAGTTTTTTTCGGC                            |
| TglB_D179A_R                             | CTCGACGTAGCATTTTTTGAACAGAATCGCTGTG                           |
| TglB_R397A_F                             | CATGTATGTCGGTGCATACCCGGTCTACGAGGATTG                         |
| TglB_R397A_R                             | CGGGTATGCACCGACATACATGGCGC                                   |
| TglB_E403A_F                             | GGTCTACGCAGATTGTTTCGCGCAATATCGATATC                          |
| TglB_E403A_R                             | GCGAACAATCTGCGTAGACCGGGTAGCG                                 |
| TglB_D404A_F                             | GGTCTACGAGGCATGTTTCGCGCAATATCGATATCAG                        |
| TglB_D404A_R                             | GCGAACATGCCTCGTAGACCGGGTAG                                   |
| TglB_D542A_F                             | CACTCTCCGGCATTCTGATTTCCAGTACCTCG                             |

|              |                                            |
|--------------|--------------------------------------------|
| TglB_D542A_R | GAAATCAGGAATGCCGGAGAGTGAAAGTGGC            |
| TglB_H566A_F | GAGAGGTCGCTCCGGGCGTGCACAC                  |
| TglB_H566A_R | CGCCCGGAGCGACCTCTCCAGAATGATTGAGTAGTCG      |
| TglB_R704A_F | CCTTGTACAAAGCTGCCTCGTGGTGGTTTCAG           |
| TglB_R704A_R | CGAGGCAGCTTTGTACAAGGTCTTGCCCAAG            |
| TglB_W707A_F | GCCTCGGCATGGTTCAGTCCAGAGCAAC               |
| TglB_W707A_R | GACTGAACCATGCCGAGGCGCTTTGTAC               |
| TglB_K746A_F | GTTTCGCCGCTATCGATATCGAACCCAAGCC            |
| TglB_K746A_R | CGATATCGATAGCGGCGAACACATAACGGG             |
| TglB_K752A_F | CGAACCCGCTCCGATTTTCATTGATTTTCGATAACCC      |
| TglB_K752A_R | CAATGAAAATCGGAGCGGGTTCGATATCGATCTTGCC      |
| TglB_E801A_F | CATTTCTGTTGTGCTATACGTACAACCTTTAGGGACAATGG  |
| TglB_E801A_R | GTTGTACGTATAGCACAACAGAAATGCCCGC            |
| TglB_R803A_F | CTGTTGTGAAATAGCAACAACCTTTAGGGACAATGGAG     |
| TglB_R803A_R | GGTTGTTGCTATTTCAACAACAGAAATGCCCG           |
| TglA_A50F_F  | CAAGGTCTTTTTCTGAAGCTTGC GGCCG              |
| TglA_A50F_R  | CAAGCTTCAGAAAAAGACCTTGCTCTCGATGACTTC       |
| TglA_A50K_F  | CAAGGTCTTTAAATGAAGCTTGC GGCCG              |
| TglA_A50K_R  | CAAGCTTCATTTAAAGACCTTGCTCTCGATGACTTC       |
| TglA_A50E_F  | CAAGGTCTTTGAATGAAGCTTGC GGCCG              |
| TglA_A50E_R  | CAAGCTTCATTCAAAGACCTTGCTCTCGATGACTTC       |
| TglA_A50Q_F  | CAAGGTCTTTCAGTGAAGCTTGC GGCCG              |
| TglA_A50Q_R  | CAAGCTTCACTGAAAGACCTTGCTCTCGATGACTTC       |
| TglA_A50P_F  | CAAGGTCTTTCCATGAAGCTTGC GGCCG              |
| TglA_A50P_R  | CAAGCTTCATGGAAAGACCTTGCTCTCGATGACTTC       |
| TglA_A50S_F  | CAAGGTCTTTTTCTTGAAGCTTGC GGCCG             |
| TglA_A50S_R  | CAAGCTTCAAGAAAAAGACCTTGCTCTCGATGACTTC      |
| pTXB1-TglA_F | GGTCTTTCCTGCATCACGGGAGATG                  |
| pTXB1-TglA_R | GTTGGGTTGTCCCATATGTATATCTCCTTCTTAAAGTTAAAC |
| TglA_D40A_F  | GACCTGGATGCTATGAAGTCATCGAGAGCAAG           |
| TglA_D40A_R  | GACTTCAATAGCATCCAGGTCAAACCTTTCAAAC         |
| TglA_I41A_F  | CTGGATGACGCAGAAGTCATCGAGAGCAAGG            |
| TglA_I41A_R  | GATGACTTCTGCGTCATCCAGGTCAAACCTTCTTC        |
| TglA_E42A_F  | GATGACATTGCTGTCATCGAGAGCAAGGTC             |
| TglA_E42A_R  | CTCTCGATGACAGCAATGTCATCCAGGTCAAAC          |
| TglA_V43A_F  | GATGACATTGAAGCTATCGAGAGCAAGGTCTTTG         |
| TglA_V43A_R  | GCTCTCGATAGCTTCAATGTCATCCAGGTCAAAC         |
| TglA_I44A_F  | CATTGAAGTCGCTGAGAGCAAGGTCTTTGCCTG          |

|             |                                            |
|-------------|--------------------------------------------|
| TglA_I44A_R | CTTGCTCTCAGCGACTTCAATGTCATCCAGGTC          |
| TglA_E45A_F | GAAGTCATCGCAAGCAAGGTCTTTGCCTGAAG           |
| TglA_E45A_R | GACCTTGCTTGGCGATGACTTCAATGTCATCCAGG        |
| TglA_S46A_F | CATCGAGGCAAAGGTCTTTGCCTGAAGC               |
| TglA_S46A_R | CAAAGACCTTTGCCTCGATGACTTCAATGTCATCC        |
| TglA_K47A_F | CATCGAGAGCGCAGTCTTTGCCTGAAGCTTGC           |
| TglA_K47A_R | GCAAAGACTGCGCTCTCGATGACTTCAATGTCATC        |
| TglA_V48A_F | GAGAGCAAGGCATTTGCCTGAAGCTTGCG              |
| TglA_V48A_R | CTTCAGGCAAATGCCTTGCTCTCGATGACTTC           |
| TglA_F49A_F | GAGCAAGGTCGCTGCCTGAAGCTTGCGGC              |
| TglA_F49A_R | GCTTCAGGCAGCGACCTTGCTCTCGATGACTTCAATGTCATC |

(1) Madeira, F.; Park, Y. M.; Lee, J.; Buso, N.; Gur, T.; Madhusoodanan, N.; Basutkar, P.; Tivey, A. R. N.; Potter, S. C.; Finn, R. D.; Lopez, R., *Nucleic Acids Res* **2019**, *47* (W1), W636.
